# Supplementary material for: Nitrogen-Doped Porous Carbon Derived from Biomass Used as Trifunctional Electrocatalyst toward Oxygen Reduction, Oxygen Evolution and Hydrogen Evolution Reactions
Source: PubMed Central journal article supplement (PMC7022927; doi:10.3390/nano10010076), 2019-12-31
Supplement: nanomaterials-10-00076-s001.pdf [file nanomaterials-10-00076-s001.pdf]

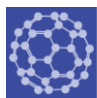

## Supplementary Materials

# Nitrogen-Doped Porous Carbon Derived from Biomass Used as Trifunctional Electrocatalyst toward Oxygen Reduction, Oxygen Evolution and Hydrogen Evolution Reactions

Chinnusamy Sathiskumar <sup>1</sup>, Shanmugam Ramakrishnan <sup>2</sup>, Mohanraj Vinothkannan <sup>2</sup> Ae Rhan Kim <sup>3</sup>, Srinivasan Karthikeyan, <sup>4</sup> and Dong Jin Yoo <sup>2,5,\*</sup>

<sup>1</sup> Centre for Nano and Soft Matter Science, (CeNS), Jalahalli, Bengaluru-560013, India; sathischem85@gmail.com

<sup>2</sup> R&D Education center for whole life cycle R&D of fuel cell systems, Jeonbuk National University, Jeollabuk-do 54896, Korea; rammtech09@gmail.com (S.R.); vinothkannanram@gmail.com (M.V.)

<sup>3</sup> R&D Center for CANUTECH, Business Incubation Center, Department of Bioenvironmental Chemistry, Jeonbuk National University, Jeollabuk-do 54896, Korea; kimaerhan@jbnu.ac.kr

<sup>4</sup> Department of Chemistry, Chikkanna Government Arts College, Tirupur-641502, Tamil Nadu, India; environkarthi@gmail.com

<sup>5</sup> Department of Life Science, Graduate School of Department of Energy Storage/Conversion Engineering, and Hydrogen and Fuel Cell Research Center, Jeonbuk National University, Jeollabuk-do 54896, Korea

\* Correspondence: djyoo@jbnu.ac.kr (D.J.Y); Tel.: +82-(0)63-270-3608. Fax: +82- (0)63-270-3909.

### Measurement of the Number of Electron and Koutecky-Levich (K-L) plot

The linear sweep voltammetry (LSV) technique was conducted with an RDE loaded with as-prepared samples at different rotation rates to investigate the electrode kinetics toward ORR. The overall electron transfer number ( $n$ ) per oxygen molecule in a typical ORR process on different electrodes can be calculated using the Koutecky-Levich (K-L) equation as follows.

$$1/j = 1/j_k + 1/0.62nFC(D)^{2/3}\omega^{1/2}\nu^{-1/6} \quad (1)$$

where  $j$  and  $j_k$  are the measured and kinetic-limited current density respectively.  $j_k$  is assumed to be a constant at a certain potential.  $F$  is the Faraday constant;  $n$  is the number of electrons transferred per oxygen molecule;  $D$  is the diffusion coefficient of  $O_2$  in 0.1M KOH;  $C$  is the bulk concentration of  $O_2$  ( $1.2 \times 10^{-3}$  mol/liter);  $\nu$  is the kinematic viscosity of electrolyte ( $0.01 \text{ cm}^2/\text{s}$ );  $\omega$  is the rotation in rpm; and  $k$  is the electron transfer rate constant. From the corresponding K-L plots, the data exhibited good linearity. Then,  $n$  can be calculated as

$$n = 4 \frac{I_d}{I_d + I_r/N} \quad (2)$$

where  $I_r$  is the ring current,  $I_d$  is the disk current, and  $N$  is the current collection efficiency of the Pt ring, which was determined to be 0.41.

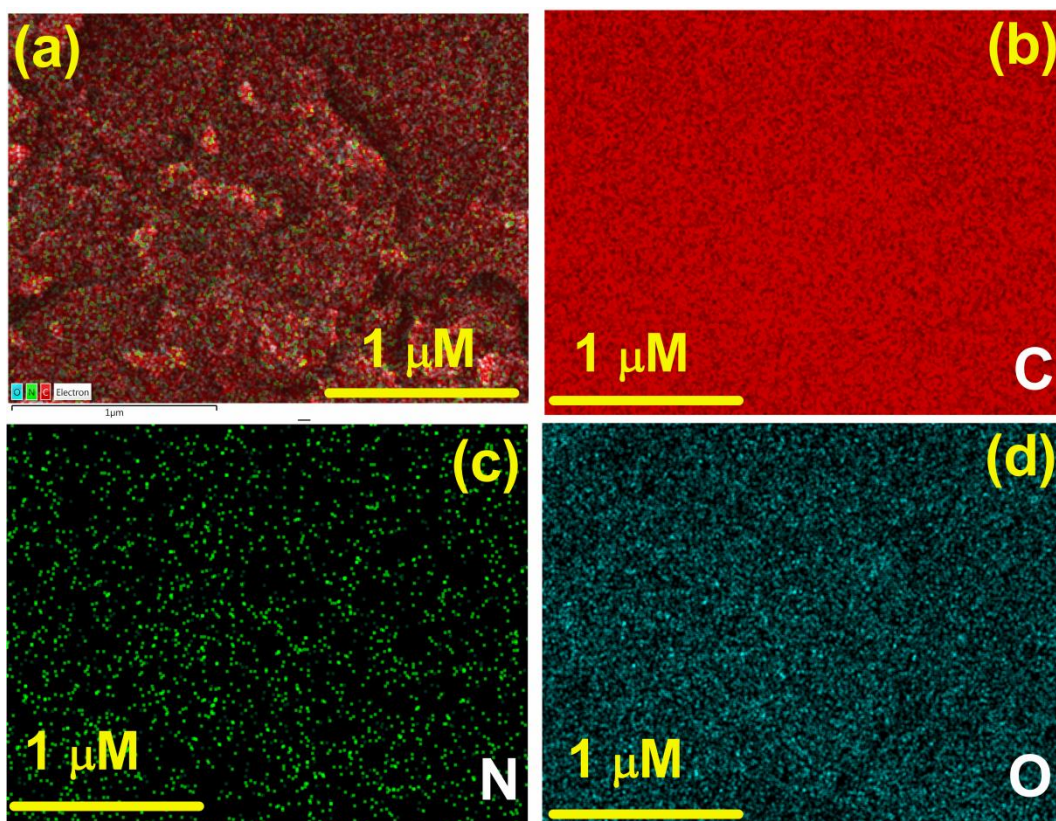

Figure S1. (a–d) SEM image elemental mapping of C, N, and O for N-PC.

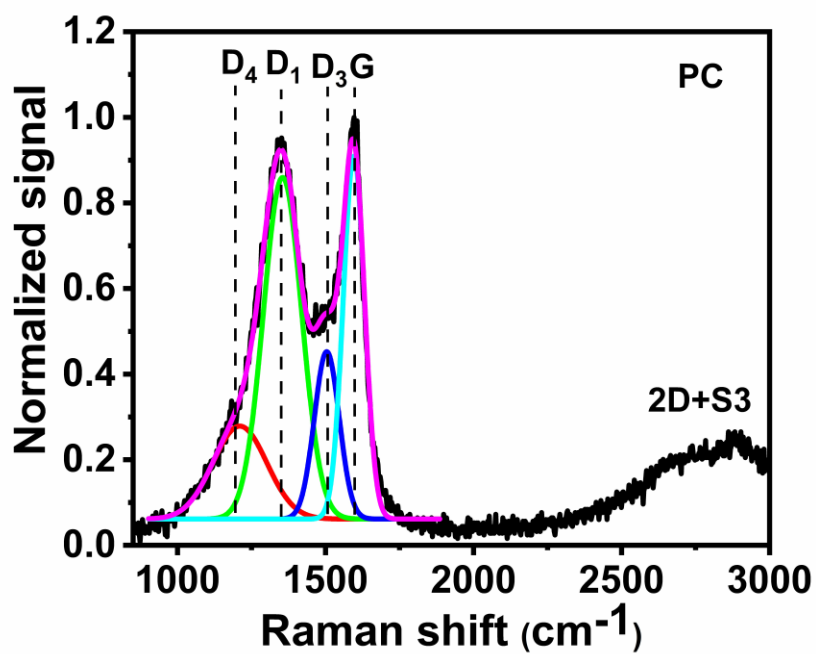

Figure S2. Raman spectrum of PC with a deconvolution of the D/G spectral region.

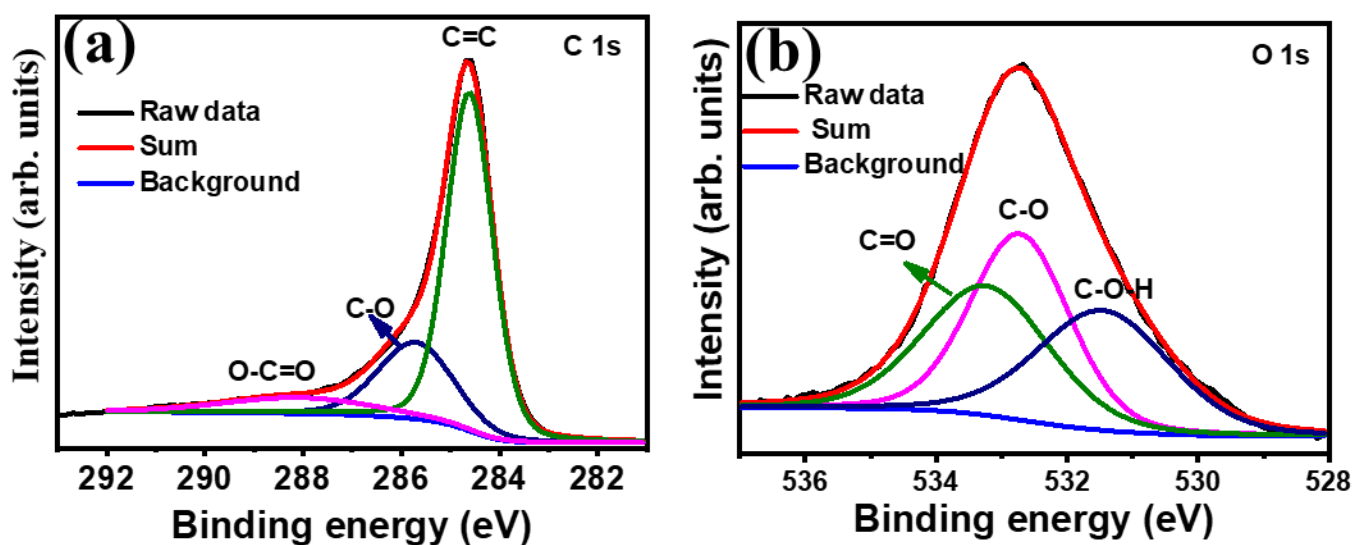

Figure S3. Deconvoluted XPS spectra of (a) C 1s and (b) O 1s for PC.

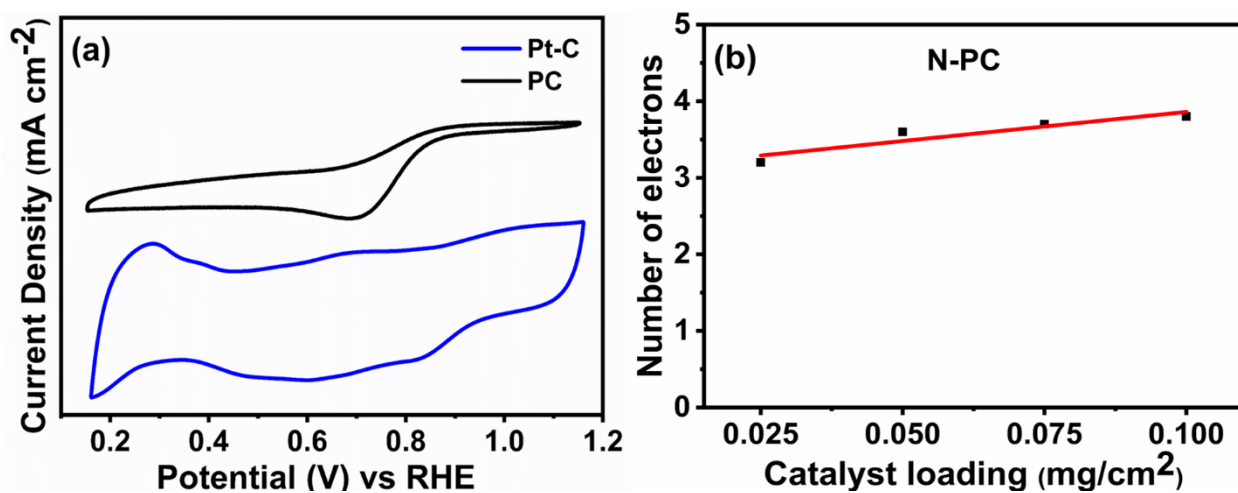

Figure S4. (a) CV curves of PC and Pt-C in O<sub>2</sub> saturated (b) Effect of the catalyst loading on the number of electrons transferred.

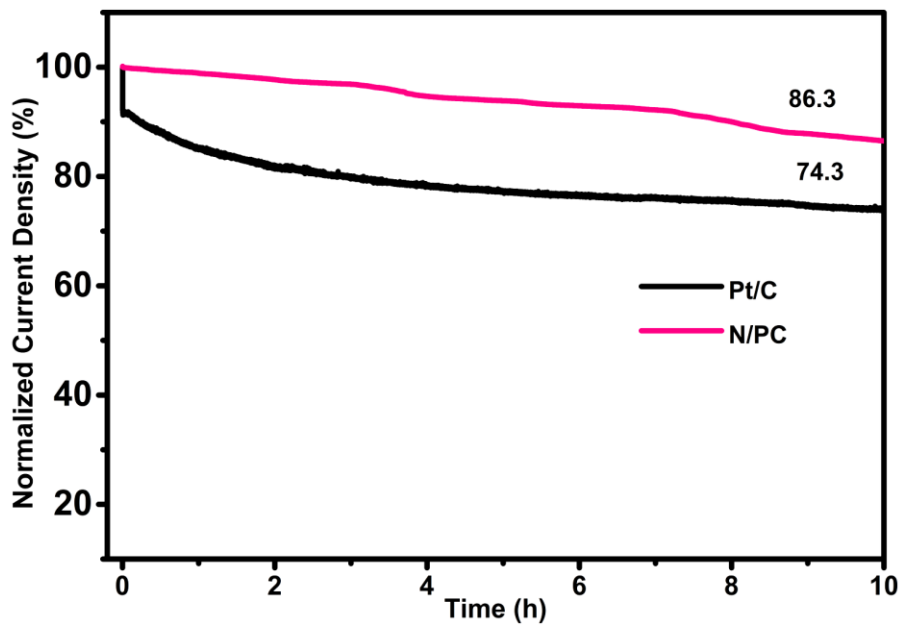

Figure S5. Long term durability of N-PC and Pt-C in 0.1 M KOH.

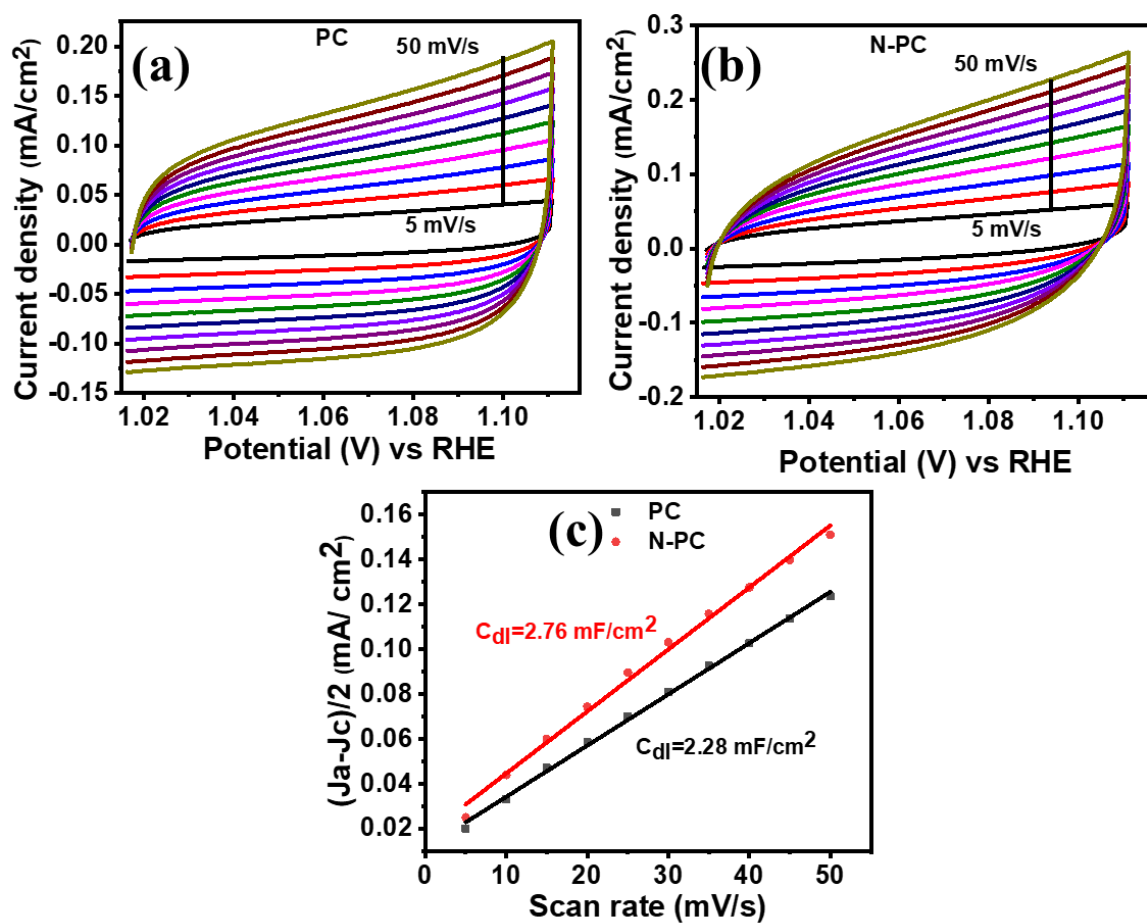

Figure S6. CV curves of (a) PC and (b) N-PC with different scan rate from 5–25 mV S<sup>-1</sup>; (c) linear fit of  $\Delta J/2$  Vs scan rate.

**Table S1.** Comparison of ORR performance for N-PC with other Bio-derived activated carbon.

| The precursor for Carbon source | Sample Name                                 | Onset potential vs RHE (V) | Electrolyte       | References |
|---------------------------------|---------------------------------------------|----------------------------|-------------------|------------|
| Golden shower                   | N/PC                                        | 0.83                       | 0.1M KOH          | This work  |
| Banana peel                     | BPPC-MO50                                   | 0.9259                     | 0.1M KOH          | [1]        |
| Banana peel                     | N-BPDC-H <sub>3</sub> PO <sub>4</sub> -1000 | 0.92                       | 0.1M KOH          | [2]        |
| wastesoybean dregs              | 3D-NCN                                      | 0.82                       | 0.1M KOH          | [3]        |
| Kidney bean                     | KB 350Z900                                  | 0.90                       | KOH               | [4]        |
| Orange peel                     | Pt/OP-AC                                    | 0.84                       | HClO <sub>4</sub> | [5]        |
| Soybean                         | Fe/CeSOYB                                   | 0.84                       | 1 M KOH           | [6]        |

**Table S2.** Comparison of OER performance for N-PC@Ni with other N-doped carbon materials.

| Sample Name          | Overpotential at 10 mA cm <sup>-2</sup> (mV) | Electrolyte | References |
|----------------------|----------------------------------------------|-------------|------------|
| N/PC@Ni              | 314                                          | 1 M KOH     | This work  |
| N/C                  | 380                                          | KOH-pH-13   | [7]        |
| N-CCs                | 460                                          | 0.1 M NaOH  | [8]        |
| NPMC                 | 390                                          | 0.1 M KOH   | [9]        |
| Fe/N-CNSs            | 498                                          | 0.1 M KOH   | [10]       |
| NMWNT                | 320                                          | 1 M NaOH    | [11]       |
| N-GRW                | 360                                          | 1M KOH      | [12]       |
| Ni foam/N-NTs/Ni(OH) | 254                                          | 1M KOH      | [13]       |
| N-doped CNTs         | 370                                          | 1M KOH      | [14]       |
| NCF-900              | 340                                          | 1 M KOH     | [15]       |

**Table S3.** Comparison of HER performance for N-PC@Ni with other N-doped carbon materials.

| Sample Name                       | Overpotential at 10 mA cm <sup>-2</sup> (mV) | Electrolyte                          | References |
|-----------------------------------|----------------------------------------------|--------------------------------------|------------|
| N/PC@Ni                           | 179                                          | 1 M KOH                              | This work  |
| NMWNT                             | 235                                          | 0.1 M NaOH                           | [11]       |
| C <sub>3</sub> N <sub>4</sub> @NG | 240                                          | 0.5 M H <sub>2</sub> SO <sub>4</sub> | [17]       |
| N,P-graphene-1                    | 422                                          | 0.5 M H <sub>2</sub> SO <sub>4</sub> | [18]       |
| Co-N-GA                           | 232                                          | 1.0 M KOH                            | [19]       |
| SHG                               | 230                                          | 0.1 M KOH                            | [20]       |
| Ni-NC700                          | 301                                          | 0.1 M KOH                            | [21]       |
| FeNi+NPC                          | 340                                          | 0.1 M KOH                            | [16]       |
| N,S-CN                            | 380                                          | 1 M KOH                              | [22]       |
| FeCo+NPC                          | 450                                          | 0.1 M KOH                            | [16]       |

## References

1. Wang, Y.; Zhu, M.; Li, Y.; Zhang, M.; Xue, X.; Shi, Y.; et al. Heteroatom-doped porous carbon from methyl orange dye wastewater for oxygen reduction. *Green Energy Environ.* **2018**, *3*, 172–178.
2. Kong, D.; Liu, L.; Yuan, W.; Xie, A.; Shen, Y. Facile synthesis and excellent catalytic performance of nitrogen-doped porous carbons derived from banana peel towards oxygen reduction reaction. *Mater Res. Bull.* **2018**, *103*, 63–69.
3. Chen, Y.; Wang, H.; Ji, S.; Lv, W.; Wang, R. Harvesting a 3D N-doped carbon network from waste bean dregs by ionothermal carbonization as an electrocatalyst for an oxygen reduction reaction. *Materials (Basel)* **2017**, *10*.
4. Dhelipan, M.; Arunchander, A.; Sahu, A.K.; Kalpana, D. Activated carbon from orange peels as supercapacitor electrode and catalyst support for oxygen reduction reaction in proton exchange membrane fuel cell. *J. Saudi Chem. Soc.* **2017**, *21*, 487–494.

5. Guo, C.Z.; Liao, W.L.; Chen, C.G. Design of a non-precious metal electrocatalyst for alkaline electrolyte oxygen reduction by using soybean biomass as the nitrogen source of electrocatalytically active center structures. *J. Power Sources* **2014**, *269*, 841–847.
6. Wang, Y.; Zhu, M.; Wang, G.; Dai, B.; Yu, F.; Tian, Z.; et al. Enhanced Oxygen Reduction Reaction by In Situ Anchoring Fe<sub>2</sub>N Nanoparticles on Nitrogen-Doped Pomelo Peel-Derived Carbon. *Nanomaterials* **2017**, *7*, 404.
7. Zhao, Y.; Nakamura, R.; Kamiya, K.; Nakanishi, S.; Hashimoto, K. Nitrogen-doped carbon nanomaterials as non-metal electrocatalysts for water oxidation. *Nat. Commun.* **2013**, *4*, 1–7.
8. Jia, N.; Weng, Q.; Shi, Y.; Shi, X.; Chen, X.; Chen, P.; et al. N-doped carbon nanocages: Bifunctional electrocatalysts for the oxygen reduction and evolution reactions. *Nano Res.* **2018**, *11*, 1905–1916.
9. Zhang, J.; Zhao, Z.; Xia, Z.; Dai, L. A metal-free bifunctional electrocatalyst for oxygen reduction and oxygen evolution reactions. *Nat. Nanotechnol.* **2015**, *10*, 444–452.
10. Jia, J.; Liu, Z.; Han, F.; Kang, G.J.; Liu, L.; Liu, J.; et al. The identification of active N species in N-doped carbon carriers that improve the activity of Fe electrocatalysts towards the oxygen evolution reaction. *RSC Adv.* **2019**, *9*, 4806–4811.
11. Davodi, F.; Tavakkoli, M.; Lahtinen, J.; Kallio, T. Straightforward synthesis of nitrogen-doped carbon nanotubes as highly active bifunctional electrocatalysts for full water splitting. *J. Catal.* **2017**, *353*, 19–27.
12. Yang, H.B.; Miao, J.; Hung, S.F.; Chen, J.; Tao, H.B.; Wang, X.; et al. Identification of catalytic sites for oxygen reduction and oxygen evolution in N-doped graphene materials: Development of highly efficient metal-free bifunctional electrocatalyst. *Sci Adv.* **2016**, *2*, e1501122.
13. Wu, J.; Subramaniam, J.; Liu, Y.; Geng, D.; Meng, X. Facile assembly of Ni(OH)<sub>2</sub> nanosheets on nitrogen-doped carbon nanotubes network as high-performance electrocatalyst for oxygen evolution reaction. *J. Alloys Compd.* **2018**, *731*, 766–773.
14. Xia, B.Y.; Yan, Y.; Li, N.; Wu, H.B.; Lou, X.W.D.; Wang, X. A metal-organic framework-derived bifunctional oxygen electrocatalyst. *Nat. Energy* **2016**, *1*, 1–8.
15. Yang, X.; Li, K.; Cheng, D.; Pang, W.L.; Lv, J.; Chen, X.; et al. Nitrogen-doped porous carbon: Highly efficient trifunctional electrocatalyst for oxygen reversible catalysis and nitrogen reduction reaction. *J. Mater. Chem. A* **2018**, *6*, 7762–7769.
16. Zhong, H.X.; Wang, J.; Zhang, Q.; Meng, F.; Bao, D.; Liu, T.; et al. In Situ Coupling FeM (M = Ni, Co) with Nitrogen-Doped Porous Carbon toward Highly Efficient Trifunctional Electrocatalyst for Overall Water Splitting and Rechargeable Zn-Air Battery. *Adv. Sustain. Syst.* **2017**, *1*, 1700020.
17. Zheng, Y.; Jiao, Y.; Zhu, Y.; Li, L.H.; Han, Y.; Chen, Y.; et al. Hydrogen evolution by a metal-free electrocatalyst. *Nat. Commun.* **2014**, *5*, 1–8.
18. Zheng, Y.; Jiao, Y.; Li, L.H.; Xing, T.; Chen, Y.; Jaroniec, M.; et al. Toward design of synergistically active carbon-based catalysts for electrocatalytic hydrogen evolution. *ACS Nano* **2014**, *8*, 5290–5296.
19. Zhu, Z.; Yang, Y.; Guan, Y.; Xue, J.; Cui, L. Construction of a cobalt-embedded nitrogen-doped carbon material with the desired porosity derived from the confined growth of MOFs within graphene aerogels as a superior catalyst towards HER and ORR. *J. Mater. Chem. A* **2016**, *4*, 15536–15545.
20. Hu, C.; Dai, L. Multifunctional Carbon-Based Metal-Free Electrocatalysts for Simultaneous Oxygen Reduction, Oxygen Evolution, and Hydrogen Evolution. *Adv. Mater.* **2017**, *29*, 1604942.
21. Devi, B.; Koner, R.R.; Halder, A. Ni(II)-Dimeric Complex-Derived Nitrogen-Doped Graphitized Carbon-Encapsulated Nickel Nanoparticles: Efficient Trifunctional Electrocatalyst for Oxygen Reduction Reaction, Oxygen Evolution Reaction, and Hydrogen Evolution Reaction. *ACS Sustain. Chem. Eng.* **2019**, *7*, 2187–2199.
22. Qu, K.; Zheng, Y.; Zhang, X.; Davey, K.; Dai, S.; Qiao, S.Z. Promotion of Electrocatalytic Hydrogen Evolution Reaction on Nitrogen-Doped Carbon Nanosheets with Secondary Heteroatoms. *ACS Nano* **2017**, *11*, 7293–7300.
